# Supplementary material for: Stretching-mode specificity in the Cl + CH3D(v1-I, v1-II, and v4 = 1; |jK〉) reactions: dependency on the initial |jK〉 selectivity
Source: Royal Society of Chemistry journal article supplement (doi:10.1039/d2cp03614b), 2022-01-01
Supplement: d2cp03614b1.pdf [file d2cp03614b1.pdf]

Electronic Supplementary Information for

**Stretching-mode specificity in the Cl + CH<sub>3</sub>D( $\nu_{1-I}$ ,  $\nu_{1-II}$ , and  $\nu_4$   
= 1;  $|jK\rangle$ ) reactions: Dependency on the initial  $|jK\rangle$  selectivity**

Sohidul Mondal,<sup>1</sup> Huilin Pan,<sup>1,2</sup> and Kopin Liu<sup>1,3,4\*</sup>

<sup>1</sup> *Institute of Atomic and Molecular Sciences (IAMS), Academia Sinica, P. O. Box 23-166, Taipei 10699, Taiwan*

<sup>2</sup> *Department of Chemistry, Southern University of Science and Technology, Shenzhen 518055, P. R. China*

<sup>3</sup> *Aerosol Science Research Center, National Sun Yat-sen University, Kaohsiung 80424, Taiwan*

<sup>4</sup> *State Key Laboratory of Molecular Reaction Dynamics, Dalian Institute of Chemical Physics, CAS, Dalian 116023, P. R. China*

\* *Email: kliu@po.iams.sinica.edu.tw*

This pdf contains

Fig. S1 (raw images) and Table S1 (rotational energy disposal)

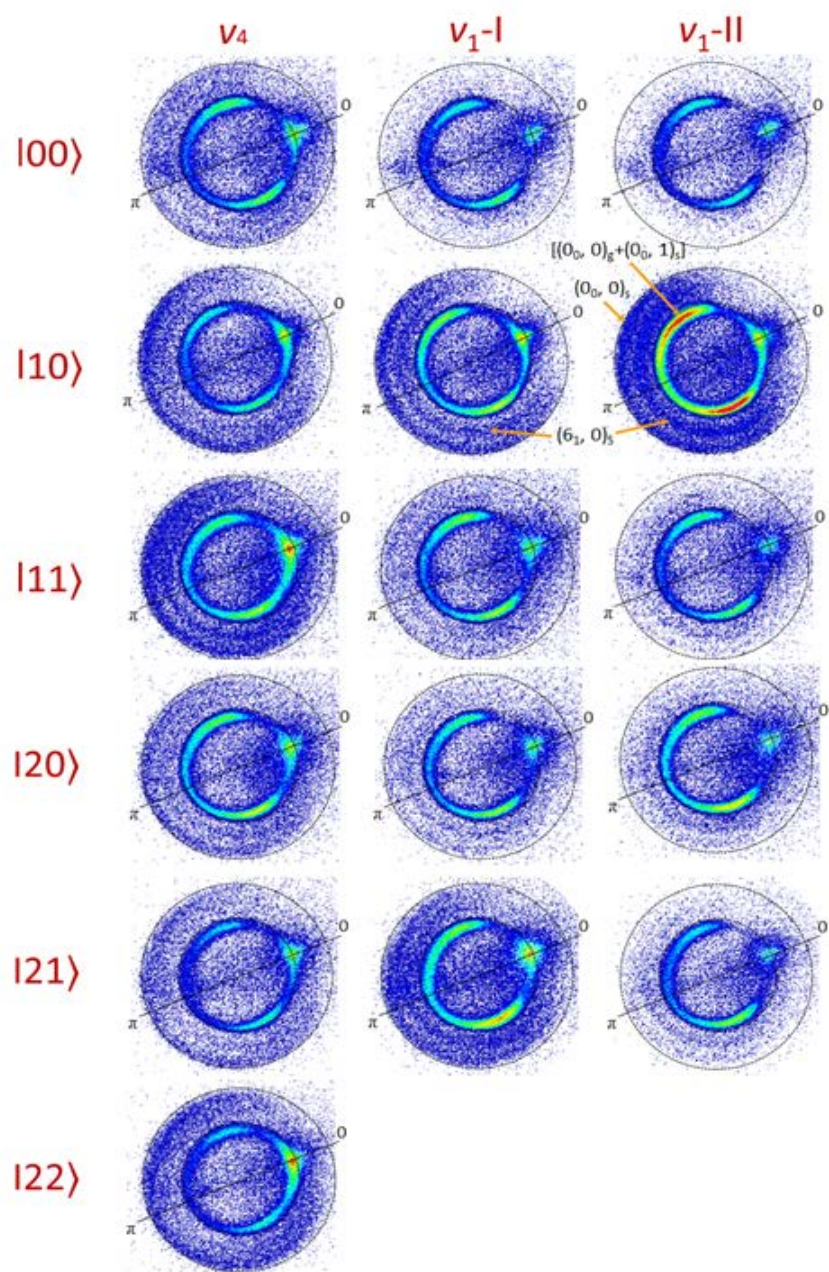

**Fig. S1** Raw difference-images, obtained by  $[(\text{IR-on}) - (1 - n_s/n_0) \cdot (\text{IR-off})]$ , of the probed  $\text{CH}_2\text{D}(0_0/6_1)$  products in 16 ro-vibrationally selected reactions of  $\text{Cl} + \text{CH}_3\text{D}(v_4, v_1-I, v_1-II; |jK\rangle)$  at  $E_c = 5.4 \text{ kcal mol}^{-1}$ .

**Table S1** Comparison of the averaged rotational energy,  $\langle E_R \rangle$  in kcal mol<sup>-1</sup>, of the (0<sub>0</sub>, 0) product pairs in both the stretch-excited and the ground-state reactions of Cl + CH<sub>3</sub>D. The  $\langle E_R \rangle$  values and the quoted uncertainties ( $\pm$  two standard deviations) were deduced from the measured TKER distributions of the corresponding (0<sub>0</sub>, 0)<sub>s/g</sub> pairs acquired in three to five independent experiments (see text for details).

| $ jK\rangle$ | (0 <sub>0</sub> , 0) <sub>g</sub> | (0 <sub>0</sub> , 0) <sub>s</sub> |             |             |
|--------------|-----------------------------------|-----------------------------------|-------------|-------------|
|              |                                   | $\nu_4$                           | $\nu_1$ -I  | $\nu_1$ -II |
| 00⟩          |                                   | 3.01 ± 0.32                       | 2.86 ± 0.32 | 2.79 ± 1.06 |
| 10⟩          |                                   | 2.52 ± 0.21                       | 2.54 ± 0.25 | 2.40 ± 0.14 |
| 11⟩          | 0.52 ± 0.20                       | 3.54 ± 0.20                       | 3.16 ± 1.16 | 3.05 ± 0.30 |
| 20⟩          |                                   | 3.22 ± 0.20                       | 3.46 ± 0.16 | 3.02 ± 0.28 |
| 21⟩          |                                   | 3.24 ± 0.36                       | 3.15 ± 0.98 | 3.02 ± 0.68 |
| 22⟩          |                                   | 2.98 ± 0.04                       |             |             |
